# Supplementary material for: Controlled synthesis of ultrasmall hexagonal NaTm0.02Lu0.98−xYbxF4 nanocrystals with enhanced upconversion luminescence
Source: Royal Society of Chemistry journal article supplement (doi:10.1039/c3tc31760a), 2013-12-16
Supplement: c3tc31760a.pdf [file c3tc31760a.pdf]

## Supporting Information

### **Controlled synthesis of ultrasmall hexagonal $\text{NaTm}_{0.02}\text{Lu}_{0.98-x}\text{Yb}_x\text{F}_4$ nanocrystals with enhanced upconversion luminescence**

5

*Xuesong Zhai, Shusen Liu, Yongling Zhang, Guanshi Qin, and Weiping Qin\**

State Key Laboratory on Integrated Optoelectronics, College of Electronic Science & Engineering,  
Jilin University, Changchun 130012, China

Corresponding author. Email: [wpqin@jlu.edu.cn](mailto:wpqin@jlu.edu.cn)

10

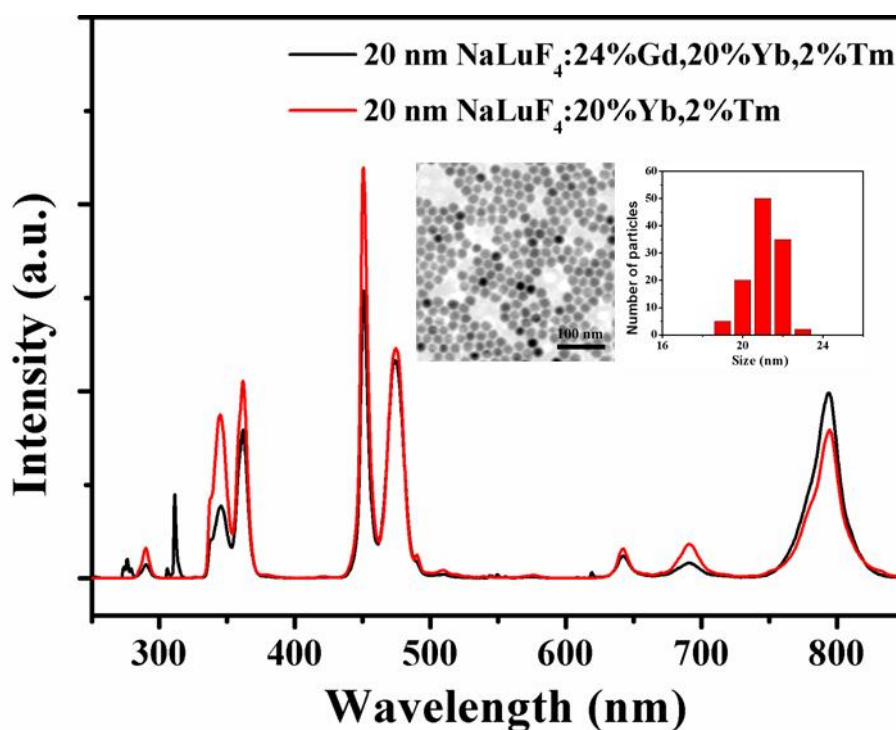

**Fig. S1** UC luminescence spectra of NaLuF<sub>4</sub>:20%Yb<sup>3+</sup>,2%Tm<sup>3+</sup> and NaLuF<sub>4</sub>:24%Gd<sup>3+</sup>,20%Yb<sup>3+</sup>,2%Tm<sup>3+</sup> nanocrystals in cyclohexane solutions under the diode laser excitation at 980 nm (0.4 W). (Inset) TEM image and histogram of NaLuF<sub>4</sub>:24%Gd<sup>3+</sup>,20%Yb<sup>3+</sup>,2%Tm<sup>3+</sup> nanocrystals are inserted in (Particle size ~ 21 nm). TEM image and histogram of NaLuF<sub>4</sub>:20%Yb<sup>3+</sup>,2%Tm<sup>3+</sup> nanocrystals (Particle size ~ 20 nm) are shown in Fig. 1c and S2c, respectively. The NaLuF<sub>4</sub>:24%Gd<sup>3+</sup>,20%Yb<sup>3+</sup>,2%Tm<sup>3+</sup> nanocrystals were synthesized using pyrolysis of lanthanum trifluoroacetic precursors.<sup>1</sup>

In Gd<sup>3+</sup> and Tm<sup>3+</sup> codoped system, Gd<sup>3+</sup> ions can be used to harvest pump photons and subsequently promote a neighboring accumulator ion (Tm<sup>3+</sup>) to excited states. Moreover, the lowest excited level (<sup>6</sup>P<sub>7/2</sub>) of Gd<sup>3+</sup> is situated in the UV region. The deleterious energy transfer between Gd<sup>3+</sup> and Tm<sup>3+</sup> will inevitably result in energy loss. Thus, Gd<sup>3+</sup> can quench the upconversion emission in the UV region.

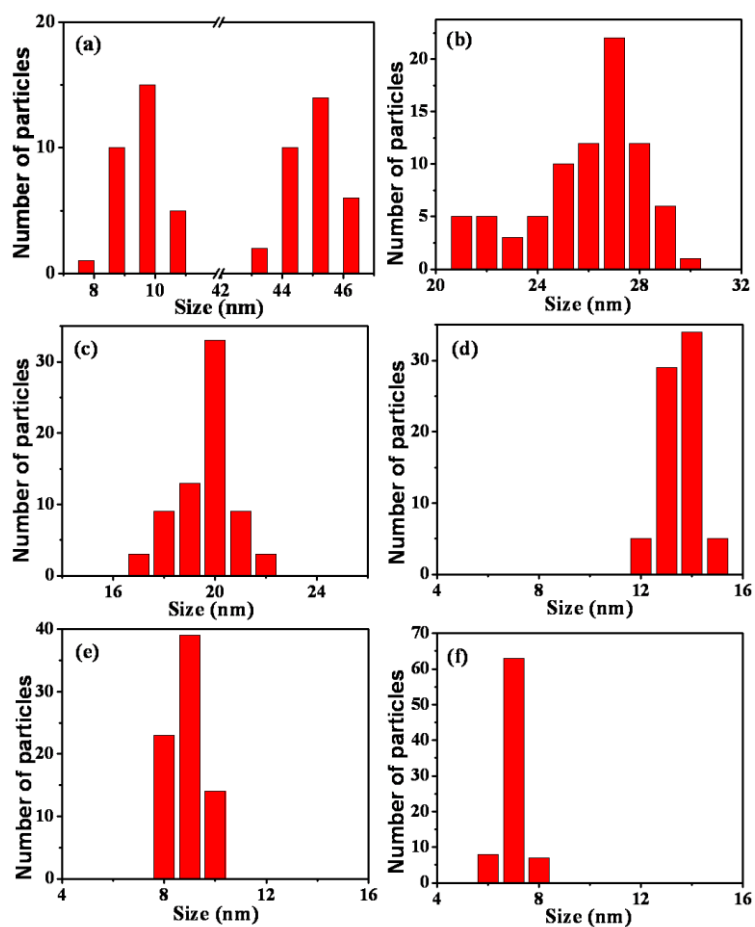

**Fig. S2** Histograms of as-prepared NaLuF<sub>4</sub> samples prepared at different OM concentrations of (a) 0, (b) 1.5 mL, (c) 3 mL, (d) 4.5 mL, (e) 6 mL, and (f) 7.5 mL.

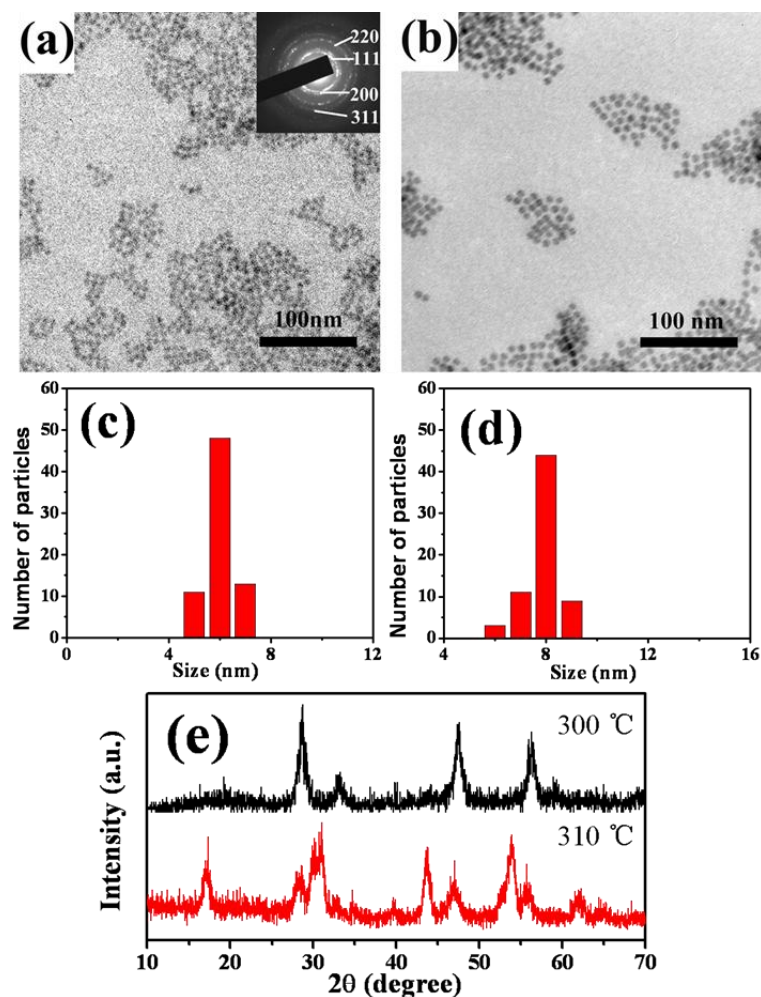

**Fig. S3** Dependence of NaLuF<sub>4</sub> nanoparticle size and phase on the reaction temperature. Increasing the reaction temperature from 300 °C (a and c) to 310 °C (b and d) led to a significant increase in the hexagonal phase (e) but only a small increase in the nanocrystal diameter. Other synthesis conditions: 6 mL OA/6 mL OM/2.5 mmol NaOA; reaction time: 1 h.

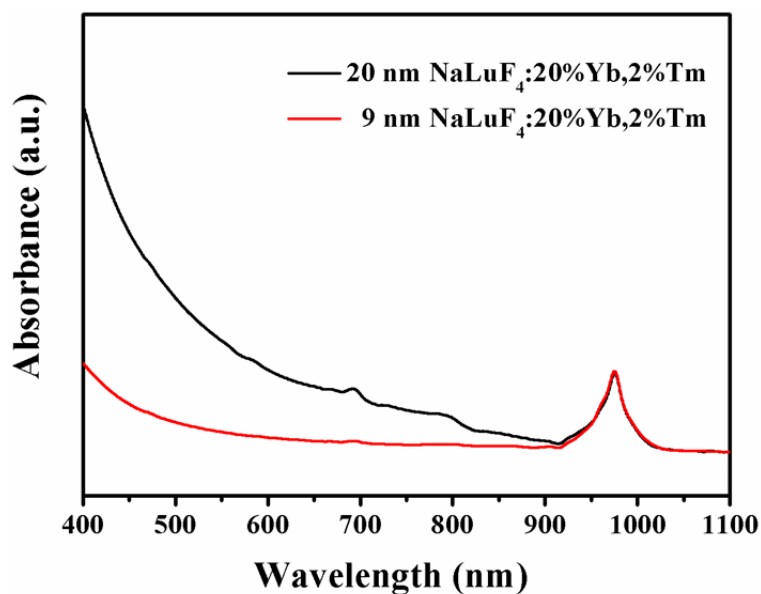

**Fig. S4** Absorption of the two colloidal suspensions was matched at 975 nm for the  $^2F_{7/2} \rightarrow 2F_{7/2}$  transition of  $\text{Yb}^{3+}$  ions. The concentrations of the nanoparticles are similar.

**Table S1** Elemental analysis of ~9 nm and 20 nm nanoparticles of  $\text{NaLuF}_4:20\% \text{Yb}^{3+}, 2\% \text{Tm}^{3+}$  as determined by inductively coupled plasma (ICP) measurement.

| Particle size (nm) | $\text{Lu}^{3+}/\text{Yb}^{3+}/\text{Tm}^{3+}$ feed ratio | $\text{Lu}^{3+}/\text{Yb}^{3+}/\text{Tm}^{3+}$ ratio in UCNPs |
|--------------------|-----------------------------------------------------------|---------------------------------------------------------------|
| ~ 9 nm             | 78/20/2                                                   | 77.61/19.95/2.44                                              |
| ~20 nm             | 78/20/2                                                   | 77.55/19.96/2.49                                              |

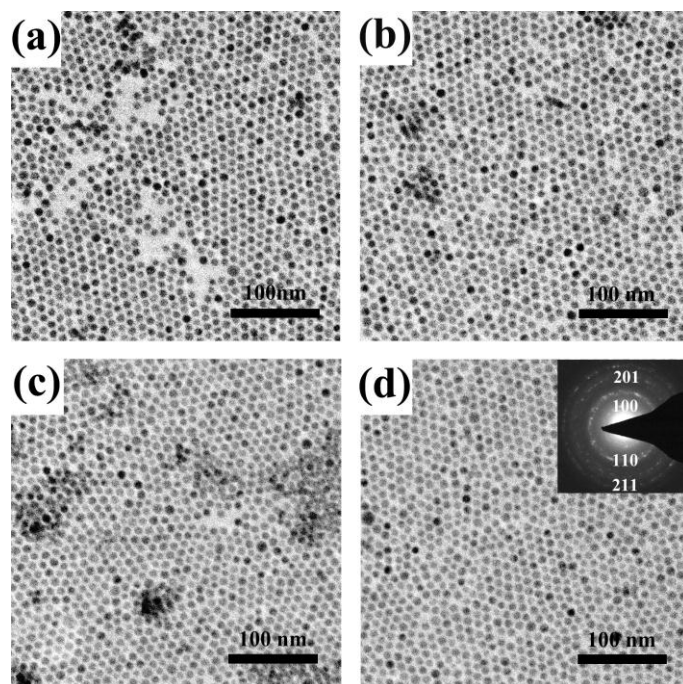

**Fig. S5** TEM images of as-prepared  $\text{NaTm}_{0.02}\text{Lu}_{0.98-x}\text{Yb}_x\text{F}_4$  nanoparticles doped with (a) 40%  $\text{Yb}^{3+}$ , (b) 60%  $\text{Yb}^{3+}$ , (c) 80%  $\text{Yb}^{3+}$ , and (d) 98%  $\text{Yb}^{3+}$  ions. The inset shows the selected area electron diffraction (SAED) pattern, indicating the hexagonal structure.

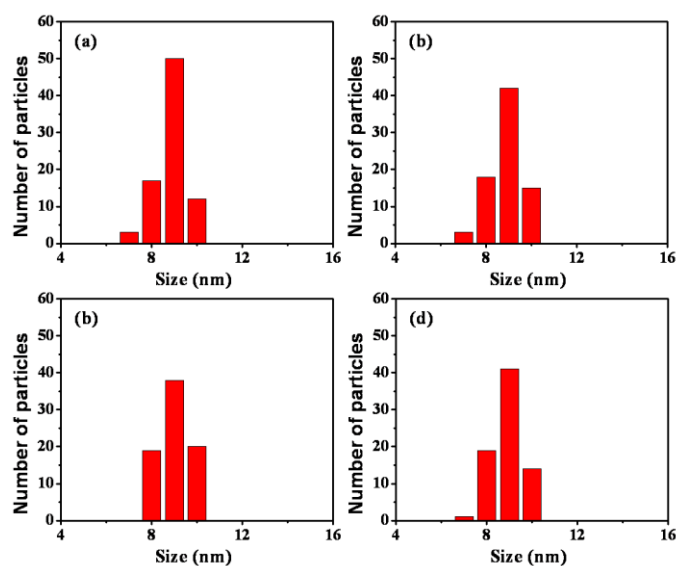

**Fig. S6** Histograms of as-prepared  $\text{NaTm}_{0.02}\text{Lu}_{0.98-x}\text{Yb}_x\text{F}_4$  nanoparticles doped with (a) 40%  $\text{Yb}^{3+}$ , (b) 60%  $\text{Yb}^{3+}$ , (c) 80%  $\text{Yb}^{3+}$ , and (d) 98%  $\text{Yb}^{3+}$  ions. All the nanoparticles of the  $\text{NaLuF}_4:\text{Yb}^{3+},\text{Tm}^{3+}$  are of hexagonal structure and monodispersed with the average diameter of around 9 nm.

The average sizes for nanoparticles with relative content of  $\text{Yb}^{3+}$  ions of 20%, 40%, 60%, and 100% were no obvious change because of the similar radius and electron charge density characteristics between  $\text{Lu}^{3+}$  and  $\text{Yb}^{3+}$  ions.

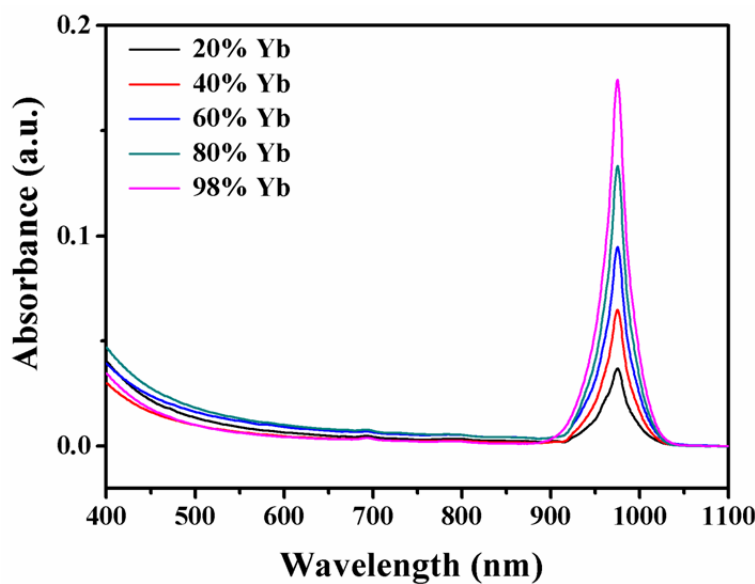

**Fig. S7** Absorption of the as-prepared NaTm<sub>0.02</sub>Lu<sub>0.98-x</sub>Yb<sub>x</sub>F<sub>4</sub> colloidal suspensions (0.1 M) doped with different Yb<sup>3+</sup> ions.

**Table S2** The feed ratio and actual ratio of various elements in the as-prepared NaTm<sub>0.02</sub>Lu<sub>0.98-x</sub>Yb<sub>x</sub>F<sub>4</sub> nanocrystal. The data are obtained from ICP measurement.

| Particle size<br>(nm) | Lu <sup>3+</sup> /Yb <sup>3+</sup> /Tm <sup>3+</sup> feed<br>ratio | Lu <sup>3+</sup> /Yb <sup>3+</sup> /Tm <sup>3+</sup> ratio in<br>UCNPs |
|-----------------------|--------------------------------------------------------------------|------------------------------------------------------------------------|
| ~ 9 nm                | 78/20/2                                                            | 77.61/19.95/2.44                                                       |
| ~ 9 nm                | 58/40/2                                                            | 58.33/39.35/2.32                                                       |
| ~ 9 nm                | 38/60/2                                                            | 38.15/59.52/2.33                                                       |
| ~ 9 nm                | 18/80/2                                                            | 18.83/78.67/2.50                                                       |
| ~ 9 nm                | 0/98/2                                                             | 0/97.54/2.46                                                           |

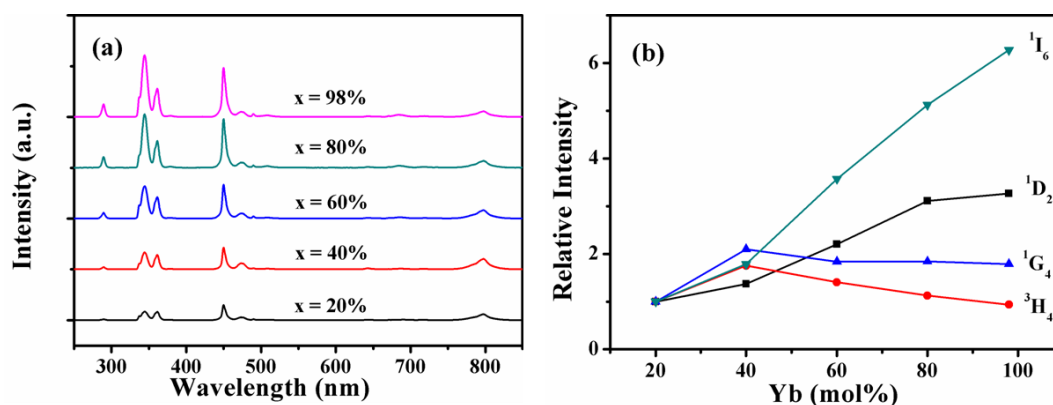

**Fig. S8** Yb<sup>3+</sup> dependent UC luminescence of NaTm<sub>0.02</sub>Lu<sub>0.98-x</sub>Yb<sub>x</sub>F<sub>4</sub>, which are calculated by Fig. S7 (Normalized at 975 nm for the <sup>2</sup>F<sub>7/2</sub> → <sup>2</sup>F<sub>5/2</sub> transition of Yb<sup>3+</sup> ions).

Obviously, the luminescent intensities of UV and blue emissions increase with the increasing Yb<sup>3+</sup> ratio. For the NIR emission, its intensity increases at the beginning and then decreases gradually. In general, their luminescence intensity can be enhanced remarkably although the emissive ion will decrease via changing the solution concentration. The luminescence enhancement should be attributed to due to the increased rate of energy transfer between Yb<sup>3+</sup> and Tm<sup>3+</sup> ions.

## References for supporting information

1. Q. Liu, Y. Sun, T. Yang, W. Feng, C. Li and F. Li, *J. Am. Chem. Soc.*, 2011, **133**, 17122.
